## ESSAY

## Expanding conservation culturomics and iEcology from terrestrial to aquatic realms

Ivan Jarić<sup>1,2,\*</sup>, Uri Roll<sup>3</sup>, Robert Arlinghaus<sup>4,5</sup>, Jonathan Belmaker<sup>6,7</sup>, Yan Chen<sup>8</sup>, Victor China<sup>9</sup>, Karel Douda<sup>10</sup>, Franz Essl<sup>11</sup>, Sonja C. Jähnig<sup>4,12</sup>, Jonathan M. Jeschke<sup>4,13,14</sup>, Gregor Kalinkat<sup>4</sup>, Lukáš Kalous<sup>10</sup>, Richard Ladle<sup>15</sup>, Robert J. Lennox<sup>16</sup>, Rui Rosa<sup>17</sup>, Valerio Sbragaglia<sup>4,18</sup>, Kate Sherren<sup>8</sup>, Marek Šmejkal<sup>1</sup>, Andrea Soriano-Redondo<sup>19,20</sup>, Allan T. Souza<sup>1</sup>, Christian Wolter<sup>4</sup>, Ricardo A. Correia<sup>15,21,22,23</sup>

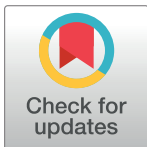

**1** Biology Centre of the Czech Academy of Sciences, Institute of Hydrobiology, České Budějovice, Czech Republic, **2** University of South Bohemia, Faculty of Science, Department of Ecosystem Biology, České Budějovice, Czech Republic, **3** Mitrani Department of Desert Ecology, The Jacob Blaustein Institutes for Desert Research, Ben-Gurion University of the Negev, Midreshet Ben-Gurion, Israel, **4** Leibniz-Institute of Freshwater Ecology and Inland Fisheries, Berlin, Germany, **5** Division of Integrative Fisheries Management, Faculty of Life Sciences, Humboldt-Universität zu Berlin, Berlin, Germany, **6** School of Zoology, Tel-Aviv University, Tel-Aviv, Israel, **7** Steinhardt Museum of Natural History, Tel-Aviv University, Tel-Aviv, Israel, **8** School for Resource and Environmental Studies, Dalhousie University, Halifax, Canada, **9** The Jacob Blaustein Center for Scientific Cooperation, The Jacob Blaustein Institutes for Desert Research, Ben-Gurion University of the Negev, Midreshet Ben-Gurion, Israel, **10** Department of Zoology and Fisheries, FAFNR, Czech University of Life Sciences Prague, Prague, Czech Republic, **11** Department of Botany and Biodiversity Research, University of Vienna, Vienna, Austria, **12** Geography Department, Faculty of Mathematics and Natural Sciences, Humboldt-Universität zu Berlin, Berlin, Germany, **13** Institute of Biology, Freie Universität Berlin, Berlin, Germany, **14** Berlin-Brandenburg Institute of Advanced Biodiversity Research, Berlin, Germany, **15** Institute of Biological and Health Sciences, Federal University of Alagoas, Av. Lourival Melo Mota, Maceió, Brazil, **16** Laboratory for Freshwater Ecology and Inland Fisheries at NORCE Norwegian Research Center, Bergen, Norway, **17** MARE—Marine and Environmental Sciences Centre, Laboratório Marítimo da Guia, Faculdade de Ciências da Universidade de Lisboa, Cascais, Portugal, **18** Institut de Ciències del Mar, CSIC, Barcelona, Spain, **19** CIBIO/InBio, Centro de Investigação em Biodiversidade e Recursos Genéticos, Laboratório Associado, Universidade do Porto, Vairão, Portugal, **20** CIBIO/InBio, Centro de Investigação em Biodiversidade e Recursos Genéticos, Laboratório Associado, Instituto Superior de Agronomia, Universidade de Lisboa, Lisbon, Portugal, **21** Helsinki Lab of Interdisciplinary Conservation Science, Department of Geosciences and Geography, University of Helsinki, Helsinki, Finland, **22** Helsinki Institute of Sustainability Science, University of Helsinki, Helsinki, Finland, **23** DBIO & CESAM—Centre for Environmental and Marine Studies, University of Aveiro, Aveiro, Portugal

\* [ivan.jaric@hbu.cas.cz](mailto:ivan.jaric@hbu.cas.cz)

## OPEN ACCESS

**Citation:** Jarić I, Roll U, Arlinghaus R, Belmaker J, Chen Y, China V, et al. (2020) Expanding conservation culturomics and iEcology from terrestrial to aquatic realms. *PLoS Biol* 18(10): e3000935. <https://doi.org/10.1371/journal.pbio.3000935>

**Published:** October 29, 2020

**Copyright:** © 2020 Jarić et al. This is an open access article distributed under the terms of the [Creative Commons Attribution License](https://creativecommons.org/licenses/by/4.0/), which permits unrestricted use, distribution, and reproduction in any medium, provided the original author and source are credited.

**Funding:** This work was supported by J. E. Purkyně Fellowship of the Czech Academy of Sciences (<https://www.avcr.cz>) (IJ), Helsinki Institute of Sustainability Science and the University of Helsinki (<https://www.helsinki.fi/en/helsinki-institute-of-sustainability-science>) (RAC), EU Horizon 2020 research and innovation programme funding (project grant No. 677039) (<https://ec.europa.eu/programmes/horizon2020/en>) (ATS), European Regional Development Fund / European Social Fund (ERDF/ESF) funding (CZ.02.1.01/0.0/0.0/16\_025/0007417) ([https://ec.europa.eu/regional\\_policy/en/funding/erdf/](https://ec.europa.eu/regional_policy/en/funding/erdf/); <https://ec.europa.eu/esf/home.jsp>) (ATS), Austrian Science Foundation FWF (grant I 3757-B29) (<https://www.fwf.ac.at>) (FE), EU and the State of Mecklenburg-Vorpommern (Germany, grant MV-1.18-LM-004, B 730117000069) (<https://www>).

## Abstract

The ongoing digital revolution in the age of big data is opening new research opportunities. Culturomics and iEcology, two emerging research areas based on the analysis of online data resources, can provide novel scientific insights and inform conservation and management efforts. To date, culturomics and iEcology have been applied primarily in the terrestrial realm. Here, we advocate for expanding such applications to the aquatic realm by providing a brief overview of these new approaches and outlining key areas in which culturomics and iEcology are likely to have the highest impact, including the management of protected areas; fisheries; flagship species identification; detection and distribution of threatened, rare, and alien species; assessment of ecosystem status and anthropogenic impacts; and social impact assessment. When deployed in the right context with awareness of potential biases, culturomics and iEcology are ripe for rapid development as low-cost research

government-mv.de/Mecklenburg%E2%80%9393Vorpommern) (RA), German Federal Ministry for Education and Research (BMBF) (<https://www.bmbf.de>) with the grants 01LC1826D and 033W046A (RA) and the “GLANCE” project (Global Change Effects in River Ecosystems; 01 LN1320A) (SCJ, GK), Czech Science Foundation (grant 19-05510S) (<https://gacr.cz>) (KD), Israel Science Foundation (grant No. 406/19) (<https://www.isf.org.il>) (UR), Foundation for Science and Technology (FCT) strategic project UID/MAR/04292/2013 (<https://www.fct.pt>) (RR), Norwegian Research Council (<https://www.forskningsradet.no>) (RJL), Spanish Ministry of Science, Innovation and Universities (Juan de la Cierva Incorporación; grant IJC2018-035389-I) (<http://www.ciencia.gob.es>) (VS), Social Sciences and Humanities Research Council of Canada (grant 435-2018-1018) (<https://www.sshrc-crsh.gc.ca>) (YC), Nova Scotia Graduate Scholarship (<https://www.dal.ca/faculty/gradstudies/funding/approces/scholarshipprefs/nsgs.html>) (YC), grant NAKI II DG18P020VV057 (<https://starfos.tacr.cz>) (LK), TACR ZÉTA project (No. TJ02000012) (<https://starfos.tacr.cz>) (MŠ). The funders had no role in study design, data collection and analysis, decision to publish, or preparation of the manuscript.

**Competing interests:** The authors have declared that no competing interests exist.

**Abbreviations:** API, Application Programming Interface; CBD, Convention on Biological Diversity; ICPDR, International Commission for the Protection of the Danube River; IUCN, International Union for Conservation of Nature; SDG, Sustainable Developmental Goal; WWF, World Wide Fund for Nature.

approaches based on data available from digital sources, with increasingly diverse applications for aquatic ecosystems.

## Introduction

The digital revolution provides unique opportunities to gain additional or complementary knowledge on the environment and related human values, attitudes, norms, preferences, and behaviors. Culturomics and iEcology are emerging research fields that mine digital data generated by people as part of their daily lives to develop new insights with low sampling costs and high spatiotemporal breadth (S1 and S2 Figs) [1,2]. The methods of culturomics, which focuses on the study of human culture through the quantitative analysis of large bodies of digital data [3], are being used to study contemporary problems in conservation [1] through the prism of human–nature interactions. Such applications include the study of societal interest in different organisms and ecosystem services; attitudes of stakeholders and the general public towards environmental impacts of development; human behavior concerning ongoing management and conservation efforts; and the distribution, intensity, and spatiotemporal dynamics of anthropogenic threats and resource uses [4–13].

iEcology studies ecological patterns and processes using data generated for other purposes and stored digitally [2]. It uses similar data sources and analytical tools as culturomics but extracts information that addresses broad ecological questions such as species occurrences, distributional range shifts, population dynamics, life history, ecological status, and monitoring of target taxa such as alien, rare, or threatened species (S1 Table) [14,15].

Scientists working on the terrestrial realm have harnessed the potential of culturomics and iEcology applications, but their use in aquatic realms is far more limited and faces greater challenges. Here, we advocate for a wider application of these new digital approaches to the science and conservation of freshwater and marine environments and those who depend on them, discuss the relevance and potential of such applications, present associated challenges and limitations, and highlight key areas in which these new approaches may have the most impact.

## Making a case for aquatic culturomics and iEcology

The aquatic environment comprises both marine and freshwater ecosystems, which together cover approximately 72% of the Earth’s surface. These ecosystems provide essential services to people, with the majority of human populations living along coasts and within river basins, and thus are widely recognized as conservation priorities [16–18]. Indeed, freshwater and marine coastal habitats are severely threatened by the synergistic effects of anthropogenic pressures such as habitat loss, damming, invasive alien species, water extraction, pollution, and unsustainable harvest [19–23]. As a result, aquatic species face disproportionately higher extinction risks than terrestrial species [24,25], which impacts the well-being of communities that depend on aquatic ecosystems.

Current levels of research, monitoring, and action remain insufficient to cope with the impacts that aquatic habitats face and their consequent effects on people. Research in aquatic environments is hindered by limited accessibility and low species detectability [26,27]. Importantly, environmental impacts in aquatic environments frequently occur faster than they can be actively monitored and understood. Furthermore, conducting high-quality social science research to understand human values, attitudes, behaviors, and knowledge towards aquatic

environments is time-consuming and often costly while also lagging behind fast ecological changes or happening at scales that do not match local ecological change [28,29].

Culturomics and iEcology can provide valuable contributions to aquatic sciences and conservation as both complementary and unique sources of information. The chronic data and research deficits of aquatic systems [17,30] call for the development of novel research methods. Because culturomics and iEcology take advantage of available data, they are also far less costly than field sampling and social surveys.

Yet applying culturomics and iEcology in aquatic environments faces challenges. Online data sources dedicated to aquatic environments tend to be considerably more limited compared to terrestrial sites. Moreover, human–nature interactions are especially difficult to document in these ecosystems with digital technology (often requiring more specialized equipment—for example, waterproof cameras) and have uneven spatial coverage, with scarce data from areas farther from the shore and underwater. Nevertheless, these approaches still represent a rich source of information, and their potential should improve as technological advances such as underwater wireless connection provide new opportunities to document our interactions underwater [31].

Below, we present promising areas of application of culturomics and iEcology, focusing on those that are particularly relevant for aquatic ecosystems, including the detection and distribution of threatened, rare, and alien species; ecosystem status and anthropogenic impacts; wildlife and fisheries management; flagship species identification; protected areas management; and social impact assessment for development proposals. We further provide examples from published works (S1 Table).

### Detection, mapping, and monitoring of threatened, rare, and alien species

Compared to their terrestrial counterparts, many aquatic species are chronically under-sampled. Since marine and freshwater surveys are comparatively expensive, harnessing alternative sources of data on species distributions is critical. One of the most common ecological applications of online digital data is to explore species occurrences and distribution [2]. The ever-expanding stream of user-generated content (including geospatially coded photographs, videos, and audio recordings) in online platforms such as Facebook, Instagram, YouTube, or news media can be used to identify and detect species presence and map their distributions, population densities, and group sizes to monitor their spatiotemporal dynamics. Such sources could be particularly relevant for identifying new or remnant populations of rare or threatened species, as well as for early detection and monitoring of alien species. Recordings can also provide data on both species' presences and absences. Such methods have so far been applied to monitor various aquatic mammals, including cetaceans in the Mediterranean Sea [32,33], Hawaiian monk seals (*Neomonachus schauinslandi*) in the Hawaiian Islands [34], and Eurasian otters (*Lutra lutra*) in South Korea [35]. Online media can also be used to study spatiotemporal intraspecific phenotypic variation [36], as well as species co-occurrence patterns. The imminent arrival of automatic species identification following progress in machine learning methods [37–39] and growing taxonomic reference image databases [40] will further increase the utility of such approaches. The application of marine and freshwater ecoacoustics (i.e., the study of soundscapes and the relationship between sound and the environment) [41,42] to video and audio documents made available online could also further enhance these capabilities. While most such recordings would not be useful as data sources, the sheer number of videos uploaded daily will ensure that even a very small proportion of usable documents will result in large data sets suitable for analysis. Soundscape assessment approaches have been already demonstrated in the terrestrial realm [43]. Digital sources could also be mined for past occurrences as well as used for monitoring species in real time. Nevertheless, the availability of

spatial digital data is strongly driven by species characteristics, including charismatic traits, body size, conspicuousness, proximity to humans, and socioeconomic value, restricting most studies to vertebrates. One approach that could greatly facilitate monitoring of noncharismatic and less conspicuous elements of biodiversity would be the development of automated species recognition to analyze background information in digital data, such as species captured unintentionally in the background of photos and videos. Such monitoring methods could also prove more comprehensive than monitoring based on targeted videos and images (i.e., in which the species was filmed intentionally) since they entail fewer potential biases due to human agency (see below) and might be especially relevant for monitoring sessile species, e.g., vegetation [44].

### **Ecosystem status and impacts**

Digital approaches can complement conventional methods to detect and monitor changes in ecological community and population structure, phenology, and impacts of extreme events and climate change [15,44,45]. They can also be used as early warning systems for ecosystem phase shifts or emergent impacts [46]. For example, analyzing Google Images revealed a likely climate-change-driven phenological shift in the breeding periods of Japanese dace (*Triblodon hakonensis*) [47] and identified the prevalence and intensity of parasite-induced coloration phenomenon in Caribbean reef fish [48]. Digital photo analysis was also used to identify the extent of anthropogenic impacts and degradation of coral reefs from central Pacific atolls and the Caribbean Sea [4]. iEcology cannot replace standard field studies, but its broad geographical reach could make it an effective tool for preliminary screening and identification of priority areas to focus research effort.

### **Wildlife and fisheries management**

Culturomics and iEcology can help wildlife and fisheries managers monitor distributions, compositions, and dynamics of communities; fishing or hunting practices; fishers' or hunters' activities and behaviors; fisheries or managed harvest sustainability; and wildlife trade. Several studies have inferred fish population trends and overfishing from temporal trends in fish size and composition using digitally stored data such as photographs and news articles [14,49,50]. Furthermore, historical data from digitized texts, photographs, or ship logs can provide insights into the distribution or abundance of species at times when scientific sampling data are limited [51]. Culturomics can shed light on the behavior and preferences of fishers [52], for example, by assessing regional characteristics of recreational fisheries based on YouTube videos or discussion forums (Fig 1A) [7,9,12] or by analyzing internet search frequency to explore global trends in fishing interest and seasonality [5]. These approaches can also be used to monitor the effectiveness of fisheries management initiatives by tracking attitudes and compliance of fishers before, during, and after implementation of regulations and to anticipate reactions.

### **Flagship umbrella species**

Flagship and umbrella species (or the integration of both concepts as “flagship umbrella species”) [53], respectively, represent conservation surrogate species with a potential to be used as the focus of a broader conservation marketing campaign [54] and species whose conservation confers a protective umbrella to numerous co-occurring species [55]. Both concepts are still underutilized in aquatic environments (with the exception of some marine mammals and sea turtles) [56,57] because of the lower accessibility and visibility of aquatic species and ecosystems. Culturomics and iEcology can be valuable approaches to identify flagship and umbrella species and monitor their public uptake [1]. Culturomics can help identify promising flagship

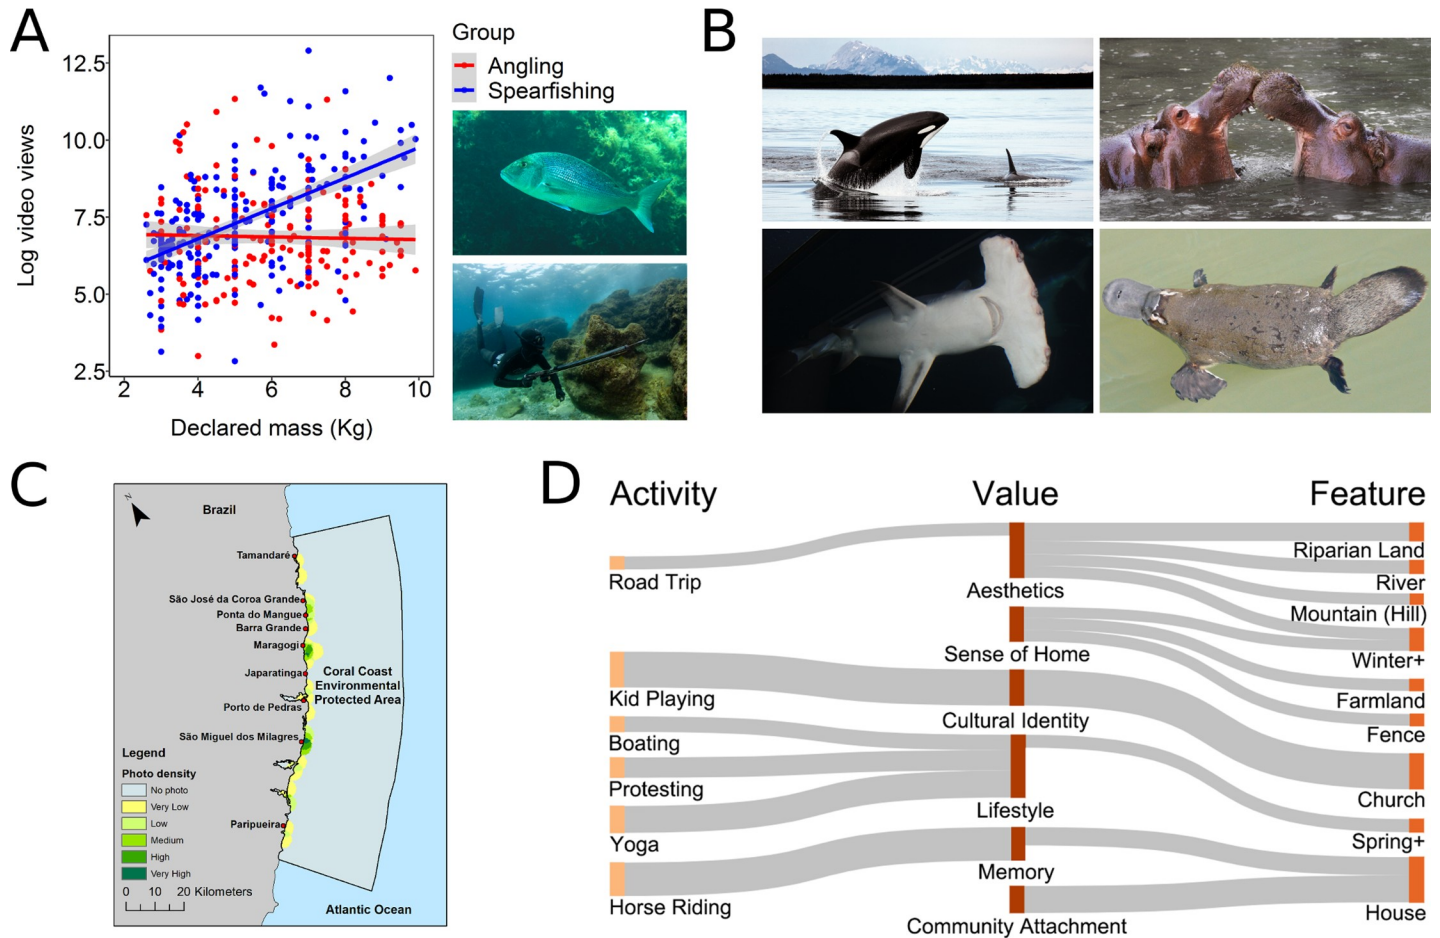

**Fig 1. Examples of aquatic culturomics and iEcology studies.** (A) Social engagement of marine recreational anglers and spearfishers targeting common dentex (*Dentex dentex*), an iconic species for Mediterranean fisheries, based on videos posted on YouTube [12]; upper photo—common dentex, lower photo—spearfisher. (B) Potential aquatic flagship species identified based on their popularity (relative internet search frequency) [59]; presented are top-ranked marine (killer whale, *Orcinus orca*, and great hammerhead, *Sphyrna mokarran*) and freshwater species (hippopotamus, *Hippopotamus amphibius*, and platypus, *Ornithorhynchus anatinus*). (C) Mapping of cultural ecosystem service hotspots in a marine protected area, based on social media photographs [11]. (D) Conceptual landscape perception map, based on statistical relationships between activities, values, and features coded from landscape images and captions on Instagram, from the proposed headpond area of the now-approved Site C dam, Peace River, British Columbia, Canada [6,68]. See the supporting information (S1 Text) for image attributions.

<https://doi.org/10.1371/journal.pbio.3000935.g001>

species based on societal interest across many candidate species (Fig 1B) [58,59], while iEcology can help identify potential umbrella species by mapping their distribution and overlaps with key habitats and co-occurring species. Culturomics can also help gauge the effects of public awareness campaigns and behavior change interventions that employ flagship species [60] and help assess and adapt social marketing strategies. Examples in which these concepts have been already applied in the aquatic realm show that they can work well in practice. For example, species such as salmonids, sturgeons, and freshwater dolphins have been promoted as freshwater flagships by the International Union for Conservation of Nature (IUCN), World Wide Fund for Nature (WWF), and International Commission for the Protection of the Danube River (ICPDR) [57].

### Management of protected areas and landscapes

Culturomics can provide valuable and cost-effective information for managing protected areas, including data on tourism pressures, use of different habitats for recreation, cultural

ecosystem services, and societal awareness, attitudes, and sentiments [61,62]. Obtained insights can be critical for developing management and marketing programs, especially in protected areas that have no monitoring systems in place [61]. Image-sharing platforms such as Flickr and Instagram provide information on tourist preferences for nature-based experiences in protected areas [63]. Many protected areas are exposed to high tourist visitation frequency, which makes them especially suitable for developing monitoring programs based on culturomics approaches [61,64]. These have been used to assess cultural ecosystem services, as well as tourism preferences and intensity, in Ramsar wetlands in South Korea [10] and India [65] and in marine protected areas such as Brazil's Costa dos Corais (Fig 1C) [11] or Australia's Great Barrier Reef [66]. Such studies mostly map geocoded images, which can be augmented with automated facial expression analyses or sentiment analyses of captions [10,11,13,65,66] to provide better insight into tourist attitudes and preferences.

### Social impact assessment

Social media and other digital data sources can be effectively utilized to assess the social impacts of construction or infrastructure development [6], to evaluate activities and values associated with landscape features and cultural ecosystem services, and to help anticipate the expected impacts of planned projects [67,68]. Such projects include hydroelectric dams, offshore wind parks, oil platforms, gravel extraction, channelization, embankments, and development of marinas, ports, and touristic resorts. These approaches have already been used for social impact assessment of planned and existing hydroelectric dams on the Peace and St. John Rivers in Canada using Instagram data (Fig 1D) [67,68], as well as the Three Gorges Dam in China using sentiment analysis of news articles, forums, and blogs [69]. While they are yet to be incorporated in environmental decision-making, these methods have a great potential to become relevant part of this process, especially for large-scale projects and impacts, for which traditional social impact assessment methods may be impractical.

### Caveats and challenges in culturomics and iEcology in aquatic environments

Ensuring reliable results when using digital data for the purposes described here faces important caveats and challenges. These issues are linked to both data generation and data extraction and encompass sociocultural aspects, accessibility, geographic factors, data sources, systematic differences between users and nonusers of digital data, and ethical considerations (Fig 2).

Digital data availability and representativeness can be affected by various cultural, political, and socioeconomic factors, as well as demographic characteristics such as age, gender, and education. Furthermore, biases may also arise from different cultural norms, taboos, and misconceptions, as well as differences in internet and online platform usage motivations and habits, and their changes over time [70,71]. Social media users often represent a specific stratum of the population, and data may be biased towards more active users and specific social groups [61,71]. For example, recreational fishers posting about their catch and expressing their opinion may deviate from a random sample [72], and their featured species may be biased towards larger and more impressive species and individuals [12]. Furthermore, rural, traditional, and indigenous societies are usually underrepresented in digital data, and data generated by tourism can interfere with assessments of local population attitudes and behaviors [1]. Another prevalent challenge is that the way people represent themselves on social media is often far removed from reality, and their interactions with others are filtered to make their representation appropriate to the intended audiences [61,73]. Digital data are also characterized by a range of linguistic challenges, including language barriers, semantic complexity, linguistic

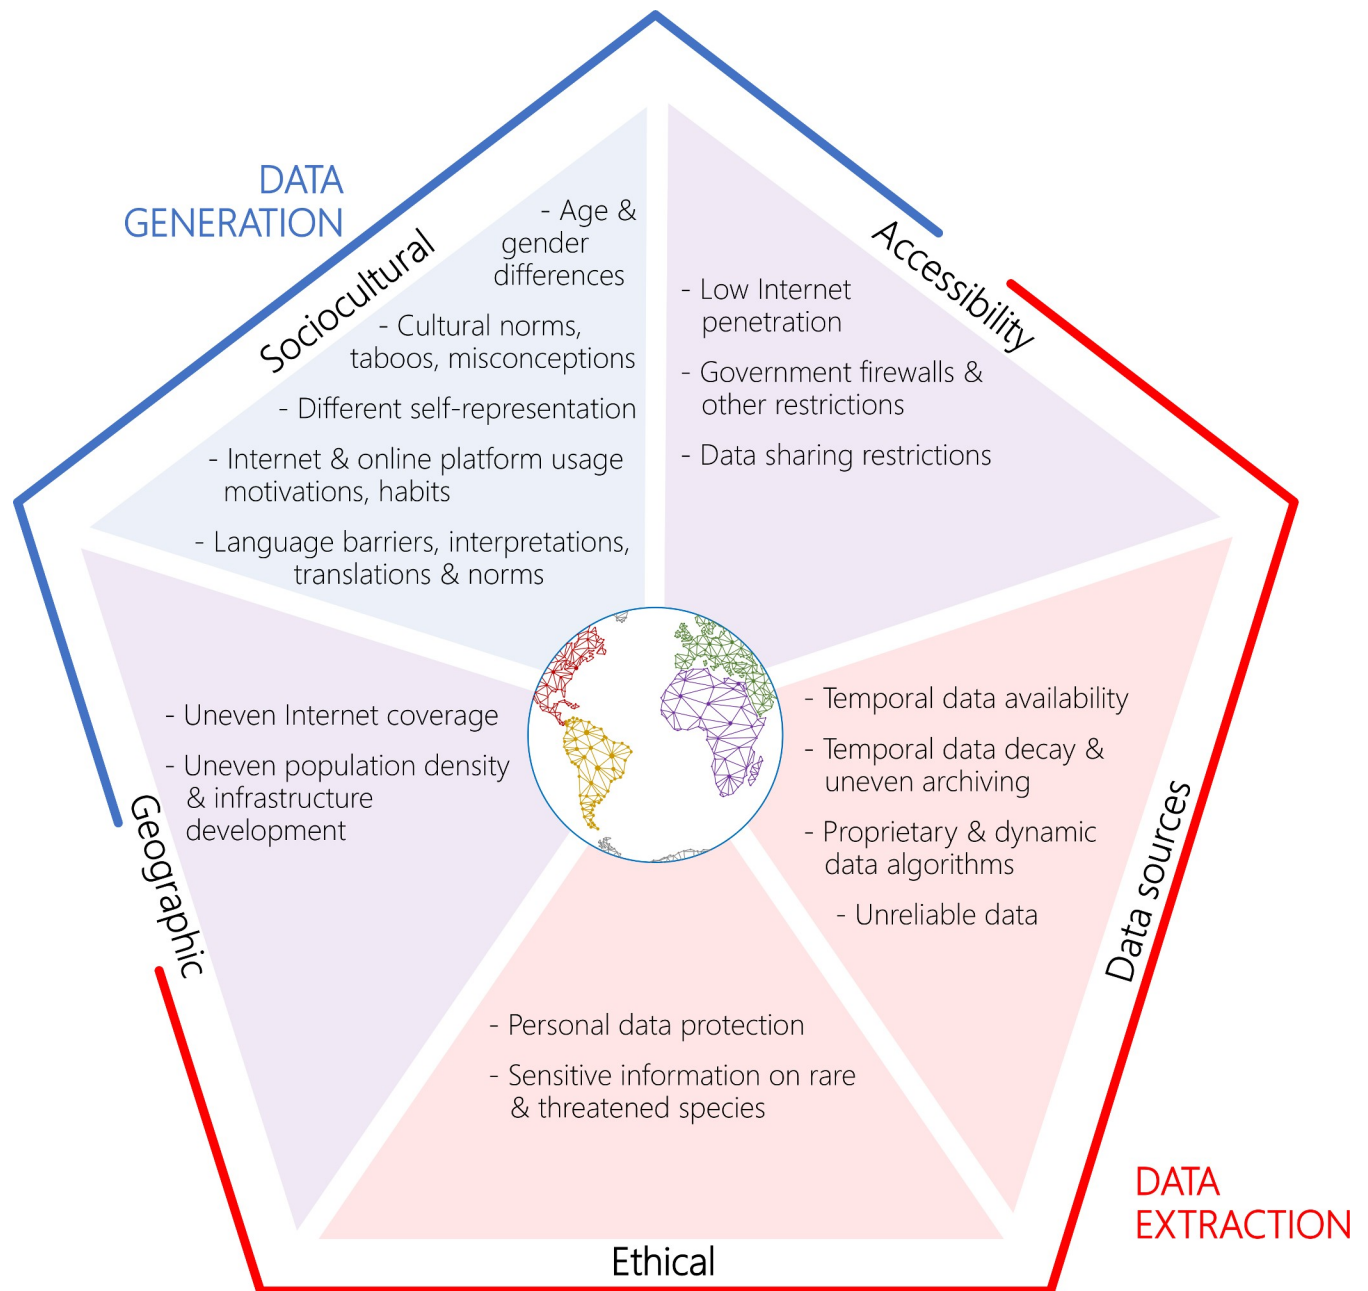

**Fig 2. Overview of challenges and biases associated with conservation culturomics and iEcology research, divided into 5 groups: sociocultural aspects, accessibility issues, geographic factors, issues related to data sources, and ethical issues.** It should be noted that some of the listed issues also represent key research subjects for the field of culturomics.

<https://doi.org/10.1371/journal.pbio.3000935.g002>

diversity and instability, and challenges related to interpretations, translations, and language norms [1,70,74].

The highly uneven spatial coverage of the internet and its users is exacerbated in aquatic realms. Digital data are also much sparser, with coverage tending to decrease with distance from shore and water depth and concentrating along transportation routes, in areas with higher population density, and in recreation areas.

Digital data are also limited temporally. While there are increasing efforts to digitize past content, in many cases, the earliest available data are limited. Furthermore, data access and use are hindered by nontransparent and dynamic data-access algorithms (such as Application Programming Interfaces [APIs]), often with limited access because of proprietary constraints, data sharing restrictions and firewalls, and limited replicability [1,61,70,75]. Online data are also characterized by temporal decay (i.e., webpage removal, data loss and deletion) and uneven archiving, as well as by the presence of unreliable data (i.e., incorrect spatial and temporal information, nonexpert species identifications, false information, etc.).

The fields of culturomics and iEcology are still developing established frameworks and protocols of good practice to tackle privacy issues and ethical use [71,76]. Publicly available digital data, especially those shared on social media, often involve sensitive personal information that requires establishing a set of guidelines to ensure ethical web-scraping practices [76]. Furthermore, digital data can reveal sensitive information on rare and threatened species, such as precise locations and other attributes that could facilitate poaching and unsustainable harvesting [2].

In general, digital data are nonrandom in extent and depth and vary among users, regions, cultures, time frames, and taxonomic groups [2,75] and require calibration and validation to quantify such biases. Digital data should therefore be used with due caution in the right study context while controlling for biases. For example, extrapolating compliance or user perspectives on an issue expressed online will unlikely scale to the entire population without correcting for sample bias. Nonetheless, questions related to local communities and particular societal groups can be addressed without making population-level inferences. Some of the biases related to digital data should diminish over time as internet penetration improves. Inferences obtained from digital data can be made more robust by simultaneous use and cross-validation of multiple digital data sources such as different search engines, social media platforms, online news, and digital encyclopedias [70,77]. Additionally, whenever possible, digital data should be validated through ground-truthing and triangulation with other data sources such as systematic surveys, remote sensing, and citizen science [2,78]. Finally, culturomics and iEcology methods may be also useful to identify new problems, patterns, and hypotheses for more conventional studies in which biases can be better controlled.

## Conclusions

Culturomics, iEcology, and other emerging digital approaches have great potential to produce novel and valuable insights into the sustainable management and conservation of ecosystems and strengthen ongoing research efforts. We demonstrated the potential of these new approaches and advocated for expanding it into aquatic realms, where they are likely to increase quickly as new tools are developed and their limitations and biases are better understood and addressed (Fig 2). Emerging technologies such as automated web crawling and data processing, machine learning, automatic species identification, apps, and ecoacoustics could further enhance their utility and uptake by the scientific and conservation communities [2]. Ultimately, we envision the potential for a global digital observatory of Earth, an online platform established for continuous collection and processing of key digital data from a wide variety of sources that could provide near real-time information on ecosystem change and human–nature interactions.

With the right tools and expertise, digital data represent a rich and unique resource for both aquatic and terrestrial research. They can also contribute to monitoring progress towards the Sustainable Development Goals (SDGs) and the Post-2020 Biodiversity Goals of the Convention on Biological Diversity (CBD) [79]. For example, they can contribute to improved



knowledge and the development of research capacities in aquatic research (SDG target 14.A) and can support ongoing research and monitoring efforts related to the management of aquatic ecosystems (SDG 14.2, 14.5 and 15.1, CBD #1 and 2), biological invasions (SDG 15.8, CBD #3), climate change (SDG 13.3, CBD #6), wildlife and fishery management and trade (SDG 14.4 and 15.7, CBD #5), biodiversity protection (SDG 15.5, CBD #18), and sustainable tourism (SDG 12.B). Moreover, they can also support efforts towards human-oriented SDGs, such as those related to the impacts of poor source water quality (SDG 6) [80]. We call upon the scientific community to explore and engage with culturomics and iEcology approaches as well as to actively seek collaborations across disciplines, especially with computer and social scientists, to provide opportunities for the most effective and innovative transdisciplinary analyses of the pressing issues in the conservation of biodiversity [2,81,82].

## Supporting information

**S1 Fig. Conceptual diagram with key differences among culturomics, iEcology, and other related approaches such as citizen science and social surveys.** Differences are based on the object of study (human–nature interactions or nature itself) and the type of data generation (passive or active). Data sets generated by citizen science, social surveys, and other approaches can also represent data sources for iEcology and culturomics, as indicated by arrows. Drawings illustrate some applications of culturomics and iEcology for aquatic research: 1) fisheries management; 2) social impact assessment; 3) detection, mapping, and monitoring of threatened, rare, and alien species; 4) ecosystem status and anthropogenic impacts; and 5) identification of aquatic flagship and umbrella species.

(TIF)

**S2 Fig. Conceptual workflow of aquatic culturomics and iEcology research.** The figure highlights how data are obtained, processed, and analyzed to gain insights on aquatic ecosystems using iEcology or culturomics approaches. The shaded-out region on the left of the figure represents the more traditional aquatic research avenues that lie outside the scope of this manuscript. However, once their underlying data are digitized and shared, they too can contribute to iEcology and culturomics explorations.

(TIF)

**S1 Table. Applications of culturomics and iEcology in aquatic research.** A compilation of available examples of culturomics and iEcology studies applied in aquatic research, with associated information on studied regions and countries, data sources used, and research topics.

(XLS)

**S1 Text. Image attributions for Fig 1.**

(DOC)

## Acknowledgments

The authors thank Gertrud Haidvogel for useful comments on an earlier version of the manuscript and Zuzana Sajdlová for the drawings, as well as David Mandos Roca for the photographs. This study is a contribution of the Conservation Culturomics Working Group of the Society of Conservation Biology and the Data & Synthesis core area of the Alliance for Freshwater Life.

## References

1. Ladle RJ, Correia RA, Do Y, Joo GJ, Malhado ACM, Proulx R, et al. Conservation culturomics. *Front Ecol Environ*. 2016; 14: 269–275. <https://doi.org/10.1002/fee.1260>
2. Jarić I, Correia RA, Brook BW, Buettel JC, Courchamp F, Di Minin E, et al. iEcology: harnessing large online resources to generate ecological insights. *Trends Ecol Evol*. 2020; 35(7): 630–639. <https://doi.org/10.1016/j.tree.2020.03.003> PMID: 32521246
3. Michel JB, Shen YK, Aiden AP, Veres A, Gray MK, Pickett JP, et al. Quantitative analysis of culture using millions of digitized books. *Science*. 2011; 331: 176–182. <https://doi.org/10.1126/science.1199644> PMID: 21163965
4. Haas AF, Guibert M, Foerschner A, Co T, Calhoun S, George E, et al. Can we measure beauty? Computational evaluation of coral reef aesthetics. *PeerJ*. 2015; 3: e1390. <https://doi.org/10.7717/peerj.1390> PMID: 26587350
5. Wilde GR, Pope KL. Worldwide trends in fishing interest indicated by internet search volume. *Fish Manag Ecol*. 2013; 20: 211–222. <https://doi.org/10.1111/fme.12009>
6. Sherren K, Parkins JR, Smit M, Holmlund M, Chen Y. Digital archives, big data and image-based culturomics for social impact assessment: opportunities and challenges. *Environ Impact Assess Rev*. 2017; 67: 23–30. <https://doi.org/10.1016/j.eiar.2017.08.002>
7. Givos I, Keramidias I, Antoniou C, Deidun A, Font T, Kleitou P, et al. Identifying recreational fisheries in the Mediterranean Sea through social media. *Fish Manag Ecol*. 2018; 25: 287–295. <https://doi.org/10.1111/fme.12293>
8. Hale BW. Mapping potential environmental impacts from tourists using data from social media: A case study in the Westfjords of Iceland. *Environ Manag*. 2018; 62: 446–457. <https://doi.org/10.1007/s00267-018-1056-z>
9. Monkman GG, Kaiser MJ, Hyder K. Text and data mining of social media to map wildlife recreation activity. *Biol Conserv*. 2018; 228: 89–99. <https://doi.org/10.1016/j.biocon.2018.10.010>
10. Do Y. Valuating aesthetic benefits of cultural ecosystem services using conservation culturomics. *Ecosyst Serv*. 2019; 36: 100894. <https://doi.org/10.1016/j.ecoser.2019.100894>
11. Retka J, Jepson P, Ladle RJ, Malhado ACM, Vieira FAS, Normande IC, et al. Assessing cultural ecosystem services of a large marine protected area through social media photographs. *Ocean Coast Manag*. 2019; 176: 40–48. <https://doi.org/10.1016/j.ocecoaman.2019.04.018>
12. Sbragaglia V, Correia RA, Coco S, Arlinghaus R. Data mining on YouTube reveals fisher group-specific harvesting patterns and social engagement in recreational anglers and spearfishers. *ICES J Mar Sci*. 2019; fsz100. Epub 2019 Jun 14. <https://doi.org/10.1093/icesjms/fsz100>
13. Spalding M, Parrett CL. Global patterns in mangrove recreation and tourism. *Mar Policy*. 2019; 110: 103540. <https://doi.org/10.1016/j.marpol.2019.103540>
14. Francis FT, Howard BR, Berchtold AE, Branch TA, Chaves LCT, Dunic JC, et al. Shifting headlines? Size trends of newsworthy fishes. *PeerJ*. 2019; 7: e6395. <https://doi.org/10.7717/peerj.6395> PMID: 30783570
15. Mittermeier JC, Roll U, Matthews TJ, Grenyer R. A season for all things: Phenological imprints in Wikipedia usage and their relevance to conservation. *PLoS Biol*. 2019; 17: e3000146. <https://doi.org/10.1371/journal.pbio.3000146> PMID: 30835729
16. Allison GW, Lubchenco J, Carr MH. Marine reserves are necessary but not sufficient for marine conservation. *Ecol Appl*. 1998; 8(sp1): S79–S92. [https://doi.org/10.1890/1051-0761\(1998\)8\[S79:MRANBN\]2.0.CO;2](https://doi.org/10.1890/1051-0761(1998)8[S79:MRANBN]2.0.CO;2)
17. Collier KJ, Probert PK, Jeffries M. Conservation of aquatic invertebrates: concerns, challenges and conundrums. *Aquat Conserv*. 2016; 26(5): 817–837. <https://doi.org/10.1002/aqc.2710>
18. Tickner D, Opperman JJ, Abell R, Acreman M, Arthington AH, Bunn SE, et al. Bending the curve of global freshwater biodiversity loss: an emergency recovery plan. *Bioscience*. 2020; 70(4): 330–342. <https://doi.org/10.1093/biosci/biaa002> PMID: 32284631
19. Padilla DK, Williams SL. Beyond ballast water: aquarium and ornamental trades as sources of invasive species in aquatic ecosystems. *Front Ecol Environ*. 2004; 2: 131–138. [https://doi.org/10.1890/1540-9295\(2004\)002\[0131:BBWAAO\]2.0.CO;2](https://doi.org/10.1890/1540-9295(2004)002[0131:BBWAAO]2.0.CO;2)
20. Allan JD, Abell R, Hogan ZE, Revenga C, Taylor BW, Welcomme RL, et al. Overfishing of inland waters. *BioScience*. 2005; 55: 1041–51. [https://doi.org/10.1641/0006-3568\(2005\)055\[1041:OOIW\]2.0.CO;2](https://doi.org/10.1641/0006-3568(2005)055[1041:OOIW]2.0.CO;2)
21. Grill G, Lehner B, Thieme M, Geenen B, Tickner D, Antonelli F, et al. (2019). Mapping the world's free-flowing rivers. *Nature*. 2019; 569: 215–221. <https://doi.org/10.1038/s41586-019-1111-9> PMID: 31068722

22. Steneck RS, Pauly D. Fishing through the Anthropocene. *Curr Biol*. 2019; 29: R987–R992. <https://doi.org/10.1016/j.cub.2019.07.081> PMID: 31593682
23. IPBES. Summary for policy-makers of the global assessment report on biodiversity and ecosystem services of the Intergovernmental Science-Policy Platform on Biodiversity and Ecosystem Services. Bonn, Germany: IPBES Secretariat; 2019.
24. Dudgeon D, Arthington AH, Gessner MO, Kawabata ZI, Knowler DJ, L ev eque C, et al. Freshwater biodiversity: importance, threats, status and conservation challenges. *Biol Rev*. 2006; 81: 163–182. <https://doi.org/10.1017/S1464793105006950> PMID: 16336747
25. Webb TJ, Mindel BL. Global patterns of extinction risk in marine and non-marine systems. *Curr Biol*. 2015; 25, 506–511. <https://doi.org/10.1016/j.cub.2014.12.023> PMID: 25639240
26. Katsanevakis S, Weber A, Pipitone C, Leopold M, Cronin M, Scheidat M, et al. Monitoring marine populations and communities: methods dealing with imperfect detectability. *Aquat Biol*. 2012; 16(1): 31–52. <https://doi.org/10.3354/ab00426>
27. Hussey NE, Kessel ST, Aarestrup K, Cooke SJ, Cowley PD, Fisk AT, et al. Aquatic animal telemetry: a panoramic window into the underwater world. *Science*. 2015; 348: 1255642. <https://doi.org/10.1126/science.1255642> PMID: 26068859
28. Bragagnolo C, Malhado AC, Jepson P, Ladle RJ. Modelling local attitudes to protected areas in developing countries. *Conserv Soc*. 2016; 14: 163–182. <https://doi.org/10.4103/0972-4923.191161>
29. Stedman RC, Connelly NA, Heberlein TA, Decker DJ, Allred SB. The end of the (research) world as we know it? Understanding and coping with declining response rates to mail surveys. *Soc Nat Res*. 2019; 32: 1139–1154. <https://doi.org/10.1080/08941920.2019.1587127>
30. Schipper J, Chanson JS, Chiozza F, Cox NA, Hoffmann M, Katariya V, et al. The status of the world's land and marine mammals: diversity, threat, and knowledge. *Science*. 2008; 322(5899): 225–230. <https://doi.org/10.1126/science.1165115> PMID: 18845749
31. Shihada B, Amin O, Bainbridge C, Jardak S, Alkhazragi O, Ng TK, et al. Aqua-Fi: Delivering Internet underwater using wireless optical networks. *IEEE Commun Mag*. 2020; 58(5): 84–89. <https://doi.org/10.1109/MCOM.001.2000009>
32. Giovos I, Ganias K, Garagouni M, Gonzalvo J. Social media in the service of conservation: A case study of dolphins in the Hellenic seas. *Aquat Mamm*. 2016; 42: 12–19. <https://doi.org/10.1578/AM.42.1.2016.12>
33. Pace DS, Giacomini G, Campana I, Paraboschi M, Pellegrino G, Silvestri M, et al. An integrated approach for cetacean knowledge and conservation in the central Mediterranean Sea using research and social media data sources. *Aquat Conserv*. 2019; 29: 1302–1323. <https://doi.org/10.1002/aqc.3117>
34. Sullivan M, Robinson S, Littnan C. Social media as a data resource for #monkseal conservation. *PLoS ONE*. 2019; 14: e0222627. <https://doi.org/10.1371/journal.pone.0222627> PMID: 31644529
35. Hong S, Do Y, Kim JY, Cowan P, Joo GJ. Conservation activities for the Eurasian otter (*Lutra lutra*) in South Korea traced from newspapers during 1962–2010. *Biol Conserv*. 2017; 210: 157–162. <https://doi.org/10.1016/j.biocon.2017.03.010>
36. Leighton GR, Hugo PS, Roulin A, Amar A. Just Google it: assessing the use of Google Images to describe geographical variation in visible traits of organisms. *Methods Ecol Evol*. 2016; 7: 1060–1070. <https://doi.org/10.1111/2041-210X.12562>
37. dos Santos AA, Gonalves WN. Improving Pantanal fish species recognition through taxonomic ranks in convolutional neural networks. *Ecol Inform*. 2019; 53: 100977. <https://doi.org/10.1016/j.ecoinf.2019.100977>
38. Dujon AM, Schofield G. Importance of machine learning for enhancing ecological studies using information-rich imagery. *Endanger Species Res*. 2019; 39: 91–104. <https://doi.org/10.3354/esr00958>
39. Ditria EM, Lopez-Marcano S, Sievers M, Jinks EL, Brown CJ, Connolly RM. Automating the analysis of fish abundance using object detection: optimizing animal ecology with deep learning. *Front Mar Sci*. 2020; 7:429. <https://doi.org/10.3389/fmars.2020.00429>
40. Howell KL, Davies JS, Allcock AL, Braga-Henriques A, Buhl-Mortensen P, Carreiro-Silva M, et al. A framework for the development of a global standardised marine taxon reference image database (SMarTaR-ID) to support image-based analyses. *PLoS ONE*. 2019; 14: e0218904. <https://doi.org/10.1371/journal.pone.0218904> PMID: 31891586
41. Harris SA, Shears NT, Radford CA. Ecoacoustic indices as proxies for biodiversity on temperate reefs. *Methods Ecol Evol*. 2016; 7: 713–724. <https://doi.org/10.1111/2041-210X.12527>
42. Linke S, Gifford T, Desjonqu eres C, Tonolla D, Aubin T, Barclay L, et al. Freshwater ecoacoustics as a tool for continuous ecosystem monitoring. *Front Ecol Environ*. 2018; 16: 231–238. <https://doi.org/10.1002/fee.1779>

43. Sethi SS, Jones NS, Fulcher BD, Picinali L, Clink DJ, Klinck H, et al. Characterizing soundscapes across diverse ecosystems using a universal acoustic feature set. *Proc Natl Acad Sci USA*. 2020; 117(29): 17049–17055. <https://doi.org/10.1073/pnas.2004702117> PMID: 32636258
44. De Frenne P, Van Langenhove L, Van Driessche A, Bertrand C, Verheyen K, Vangansbeke P. Using archived television video footage to quantify phenology responses to climate change. *Methods Ecol Evol*. 2018; 9: 1874–1882. <https://doi.org/10.1111/2041-210X.13024>
45. Breckheimer IK, Theobald EJ, Cristea NC, Wilson AK, Lundquist JD, Rochefort RM, et al. Crowd-sourced data reveal social–ecological mismatches in phenology driven by climate. *Front Ecol Environ*. 2020; 18: 76–82. <https://doi.org/10.1002/fee.2142>
46. Galaz V, Crona B, Daw T, Bodin Ö, Nyström M, Olsson P. Can web crawlers revolutionize ecological monitoring? *Front Ecol Environ*. 2010; 8: 99–104. <https://doi.org/10.1890/070204>
47. Atsumi K, Koizumi I. Web image search revealed large-scale variations in breeding season and nuptial coloration in a mutually ornamented fish, *Tribolodon hakonensis*. *Ecol Res*. 2017; 32: 567–578. <https://doi.org/10.1007/s11284-017-1466-z>
48. Elmer F, Kohl ZF, Johnson PT, Peachey RB. Black spot syndrome in reef fishes: using archival imagery and field surveys to characterize spatial and temporal distribution in the Caribbean. *Coral Reefs*. 2019; 38: 1303–1315. <https://doi.org/10.1007/s00338-019-01843-3>
49. McClenachan L. Documenting loss of large trophy fish from the Florida Keys with historical photographs. *Conserv Biol*. 2009; 23: 636–643. <https://doi.org/10.1111/j.1523-1739.2008.01152.x> PMID: 19183214
50. Jiménez-Alvarado D, Sarmiento-Lezcano A, Guerra-Marrero A, Tuya F, Santana Del Pino Á, Sealey MJ, et al. Historical photographs of captures of recreational fishers indicate overexploitation of near-shore resources at an oceanic island. *J Fish Biol*. 2019; 94: 857–864. <https://doi.org/10.1111/jfb.13969> PMID: 30887506
51. van Rijn I, Kiflawi M, Belmaker J. Alien species stabilize local fisheries catch in a highly invaded ecosystem. *Can J Fish Aquat Sci*. 2020; 77(4): 752–761. <https://doi.org/10.1139/cjfas-2019-0065>
52. O'Farrell S, Chollett I, Sanchirico JN, Perruso L. Classifying fishing behavioral diversity using high-frequency movement data. *Proc Natl Acad Sci USA*. 2019; 116: 16811–16816. <https://doi.org/10.1073/pnas.1906766116> PMID: 31399551
53. Caro T. Conservation by proxy: indicator, umbrella, keystone, flagship, and other surrogate species. Washington, DC: Island Press; 2010.
54. Verissimo D, MacMillan DC, Smith RJ. Toward a systematic approach for identifying conservation flagships. *Conserv Lett*. 2011; 4(1): 1–8. <https://doi.org/10.1111/j.1755-263X.2010.00151.x>
55. Fleishman E, Murphy DD, Brussard PF. A new method for selection of umbrella species for conservation planning. *Ecol Appl*. 2000; 10(2): 569–579. [https://doi.org/10.1890/1051-0761\(2000\)010\[0569:ANMFSO\]2.0.CO;2](https://doi.org/10.1890/1051-0761(2000)010[0569:ANMFSO]2.0.CO;2)
56. Zacharias MA, Roff JC. Use of focal species in marine conservation and management: a review and critique. *Aquat Conserv*. 2001; 11: 59–76. <https://doi.org/10.1002/aqc.429>
57. Kalinkat G, Cabral JS, Darwall W, Ficetola GF, Fisher JL, Gilling DP, et al. Flagship umbrella species needed for the conservation of overlooked aquatic biodiversity. *Conserv Biol*. 2017; 31: 481–485. <https://doi.org/10.1111/cobi.12813> PMID: 27558876
58. Roll U, Mittermeier JC, Diaz GI, Novosolov M, Feldman A, Itescu Y, et al. Using Wikipedia page views to explore the cultural importance of global reptiles. *Biol Conserv*. 2016; 204: 42–50. <https://doi.org/10.1016/j.biocon.2016.03.037>
59. Davies T, Cowley A, Bennie J, Leyshon C, Inger R, Carter H, et al. Popular interest in vertebrates does not reflect extinction risk and is associated with bias in conservation investment. *PLoS One*. 2018; 13: e0203694. <https://doi.org/10.1371/journal.pone.0203694> PMID: 30256838
60. Jenks B, Vaughan PW, Butler PJ. The evolution of Rare Pride: Using evaluation to drive adaptive management in a biodiversity conservation organization. *Eval Program Plann*. 2010; 33: 186–190. <https://doi.org/10.1016/j.evalprogplan.2009.07.010> PMID: 19733908
61. Toivonen T, Heikinheimo V, Fink C, Hausmann A, Hiippala T, Järvi O, et al. Social media data for conservation science: a methodological overview. *Biol Conserv*. 2019; 233: 298–315. <https://doi.org/10.1016/j.biocon.2019.01.023>
62. Hausmann A, Toivonen T, Fink C, Heikinheimo V, Kulkarni R, Tenkanen H, et al. Understanding sentiment of national park visitors from social media data. *People Nat*. 2020; 2: 750–760. <https://doi.org/10.1002/pan3.10130>
63. Hausmann A, Toivonen T, Slotow R, Tenkanen H, Moilanen A, Heikinheimo V, et al. Social media data can be used to understand tourists' preferences for nature-based experiences in protected areas. *Conserv Lett*. 2018; 11: e12343. <https://doi.org/10.1111/conl.12343>

64. Becken S, Connolly RM, Chen J, Stantic B. A hybrid is born: Integrating collective sensing, citizen science and professional monitoring of the environment. *Ecol Inform.* 2019; 52: 35–45. <https://doi.org/10.1016/j.ecoinf.2019.05.001>
65. Sinclair M, Ghermandi A, Sheela AM. A crowdsourced valuation of recreational ecosystem services using social media data: An application to a tropical wetland in India. *Sci Tot Environ.* 2018; 642: 356–365. <https://doi.org/10.1016/j.scitotenv.2018.06.056>
66. Becken S, Stantic B, Chen J, Alaei AR, Connolly RM. Monitoring the environment and human sentiment on the Great Barrier Reef: assessing the potential of collective sensing. *J Environ Manage.* 2017; 203: 87–97. <https://doi.org/10.1016/j.jenvman.2017.07.007> PMID: 28779604
67. Chen Y, Parkins JR, Sherren K. Using geo-tagged Instagram posts to reveal landscape values around current and proposed hydroelectric dams and their reservoirs. *Landscape Urban Plan.* 2018; 170: 283–292. <https://doi.org/10.1016/j.landurbplan.2017.07.004>
68. Chen Y, Parkins JR, Sherren K. Leveraging social media to understand younger people's perceptions and use of hydroelectric energy landscapes. *Soc Nat Res.* 2019; 32: 1114–1122. <https://doi.org/10.1080/08941920.2019.1587128>
69. Jiang H, Lin P, Qiang M. Public-opinion sentiment analysis for large hydro projects. *J Constr Eng Manage.* 2016; 142: 05015013. [https://doi.org/10.1061/\(ASCE\)CO.1943-7862.0001039](https://doi.org/10.1061/(ASCE)CO.1943-7862.0001039)
70. Correia RA, Di Minin E, Jarić I, Jepson P, Ladle R, Mittermeier J, et al. Inferring public interest from search engine data requires caution. *Front Ecol Environ.* 2019; 17: 254–255. <https://doi.org/10.1002/fee.2048>
71. Ghermandi A, Sinclair M. Passive crowdsourcing of social media in environmental research: A systematic map. *Glob Environ Change.* 2019; 55: 36–47. <https://doi.org/10.1016/j.gloenvcha.2019.02.003>
72. Hunt LM, Gonder D, Haider W. Hearing voices from the silent majority: a comparison of preferred fish stocking outcomes for Lake Huron by anglers from representative and convenience samples. *Hum Dimens Wildl.* 2010; 15: 27–44. <https://doi.org/10.1080/10871200903360080>
73. Hall M, Caton S. Am I who I say I am? Unobtrusive self-representation and personality recognition on Facebook. *PLoS ONE.* 2017; 12(9): e0184417. <https://doi.org/10.1371/journal.pone.0184417> PMID: 28926569
74. Hiippala T, Hausmann A, Tenkanen H, Toivonen T. Exploring the linguistic landscape of geotagged social media content in urban environments. *Digit Scholarsh Humanit.* 2019; 34(2): 290–309. <https://doi.org/10.1093/lc/fqy049>
75. Ladle RJ, Jepson P, Correia RA, Malhado AC. A culturomics approach to quantifying the salience of species on the global internet. *People Nat.* 2019; 1: 524–532. <https://doi.org/10.1002/pan3.10053>
76. Monkman GG, Kaiser M, Hyder K. The ethics of using social media in fisheries research. *Rev Fish Sci Aquac.* 2018; 26(2): 235–242. <https://doi.org/10.1080/23308249.2017.1389854>
77. Jarić I, Correia RA, Roberts DL, Gessner J, Meinard Y, Courchamp F. On the overlap between scientific and societal taxonomic attentions—Insights for conservation. *Sci Tot Environ.* 2019; 648: 772–778. <https://doi.org/10.1016/j.scitotenv.2018.08.198>
78. Acerbi A, Kerhoas D, Webber AD, McCabe G, Mittermeier RA, Schwitzer C. The impact of the “World's 25 Most Endangered Primates” list on scientific publications and media. *J Nat Conserv.* 2020; 54: 125794. <https://doi.org/10.1016/j.jnc.2020.125794>
79. Convention on Biological Diversity. Zero draft of the post-2020 global biodiversity framework [Internet]. 2020 [cited 2020 Jul 21]. Available from: <https://www.cbd.int/article/2020-01-10-19-02-38>
80. Lam S, Cunsolo A, Sawatzky A, Ford J, Harper SL. How does the media portray drinking water security in Indigenous communities in Canada? An analysis of Canadian newspaper coverage from 2000–2015. *BMC Public Health.* 2017; 17(1): 282. <https://doi.org/10.1186/s12889-017-4164-4> PMID: 28347284
81. Sherren K, Smit M, Holmlund M, Parkins JR, Chen Y. Conservation culturomics should include images and a wider range of scholars. *Front Ecol Environ.* 2017; 15: 289–290. <https://doi.org/10.1002/fee.1507>
82. Fischer J, Manning AD, Steffen W, Rose DB, Daniell K, Felton A, et al. Mind the sustainability gap. *Trends Ecol Evol.* 2007; 22: 621–624. <https://doi.org/10.1016/j.tree.2007.08.016> PMID: 17997188
