# Supplementary material for: Expanding conservation culturomics and iEcology from terrestrial to aquatic realms
Source: PLoS Biol. 2020 Oct 29;18(10):e3000935. doi: 10.1371/journal.pbio.3000935 (PMC7595319; doi:10.1371/journal.pbio.3000935)
Supplement: S1 Table — A compilation of available examples of culturomics and iEcology studies applied in aquatic research, with associated information on studied regions and countries, data sources used, and research topics. (XLS) [file pbio.3000935.s003.xls]

## Sheet: Sheet1
Reference	Year	Journal	Region	Country	Data source	Research topic (category)	Research topic (specific)	Full reference
dos Santos & Gonçalves 2019	2019	Ecol Inform	S. America	Brazil	Google Images	Detection, distribution mapping and monitoring of threatened, rare and alien species	Automatic fish species identification from Pantanal, Brazil, based on Google Images of fish, and an assessment by convolutional neural networks	dos Santos AA, Gonçalves WN. Improving Pantanal fish species recognition through taxonomic ranks in convolutional neural networks. Ecol Inform. 2019; 53: 100977.
Giovos et al. 2016	2016	Aquat Mamm	Europe	Greece	YouTube	Detection, distribution mapping and monitoring of threatened, rare and alien species	Distribution of delphinids in Greece (Hellenic Seas)	Giovos I, Ganias K, Garagouni M, Gonzalvo J. Social media in the service of conservation: A case study of dolphins in the Hellenic seas. Aquat Mamm. 2016; 42: 12-19.
Hong et al. 2017	2017	Biol Conserv	Asia	S. Korea	News articles	Detection, distribution mapping and monitoring of threatened, rare and alien species	Distribution of Eurasian otter (Lutra lutra) in South Korea, and trends in ecotourism, conflicts with humans, research and conservation efforts	Hong S, Do Y, Kim JY, Cowan P, Joo GJ. Conservation activities for the Eurasian otter (Lutra lutra) in South Korea traced from newspapers during 1962–2010. Biol Conserv. 2017; 210: 157-162.
Jovanovic & Vukelic 2015	2015	J Environ Protect Ecol	Europe	Malta	Twitter, Google+, news articles, blogs	Detection, distribution mapping and monitoring of threatened, rare and alien species	Real-time monitoring of jellyfish in coastal waters of Malta	Jovanovic V, Vukelic D. Using geosocial analysis for real-time monitoring the marine environments. J Environ Protect Ecol. 2015; 16(4): 1344-52.
Kalous et al. 2018	2018	Knowl Manag Aquat Ec	Europe	Czechia	Forums, images	Detection, distribution mapping and monitoring of threatened, rare and alien species	Identification of new alien fish species in Czechia, based on posts and uploaded images on anglers' forums	Kalous L, Nechanská D, Petrtýl M. Survey of angler's internet posts confirmed the occurrence of freshwater fishes of the genus Ictiobus (Rafinesque, 1819) in natural waters of Czechia. Knowl Manag Aquat Ec. 2018; 419: 29.
Pace et al. 2019	2019	Aquat Conserv	Europe	Italy	Facebook, YouTube	Detection, distribution mapping and monitoring of threatened, rare and alien species	Distribution, relative density, group size and habitat suitability of cetaceans in Tyrrhenian Sea, Italy	Pace DS, Giacomini G, Campana I, Paraboschi M, Pellegrino G, Silvestri M, et al. An integrated approach for cetacean knowledge and conservation in the central Mediterranean Sea using research and social media data sources. Aquat Conserv. 2019; 29: 1302-1323.
Rothman et al. 2020	2020	Biol Invasions	Asia	Israel	Facebook	Detection, distribution mapping and monitoring of threatened, rare and alien species	Identification of new alien fish species in Mediterranean, Israel, based on uploaded images on Facebook	Rothman SB, Gayer K, Stern N. A long-distance traveler: the peacock rockskipper Istiblennius meleagris (Valenciennes, 1836) on the Mediterranean intertidal reefs. Biol Invasions. 2020; 22(8): 2401-2408.
Sullivan et al. 2019	2019	PLOS One	Oceania	USA	Instagram	Detection, distribution mapping and monitoring of threatened, rare and alien species	Monitoring of endangered Hawaiian monk seal (Neomonachus schauinslandi) population and disturbances in Hawaiian Islands	Sullivan M, Robinson S, Littnan C. Social media as a data resource for# monkseal conservation. PLoS One. 2019; 14: e0222627.
Elmer et al. 2019	2019	Coral Reefs	N. America, S. America	Multiple countries	Google Images	Ecosystem status and impacts	Prevalence and intensity of black spot syndrome in Carribean reef fish, based on the analysis of Google Images of two surgeonfish species, Acanthurus tractus and A. bahianus	Elmer F, Kohl ZF, Johnson PT, Peachey RB. Black spot syndrome in reef fishes: using archival imagery and field surveys to characterize spatial and temporal distribution in the Caribbean. Coral Reefs. 2019; 38: 1303-1315.
Haas et al. 2015	2015	PeerJ	Oceania, N. America, S. America	Multiple countries	Images	Ecosystem status and impacts	Identification of the level of anthropogenic impacts and the extent of degradation of coral reefs, based on the aesthetic scoring method and machine learning, applied to photographs from central Pacific atolls and Carribean Sea	Haas AF, Guibert M, Foerschner A, Co T, Calhoun S, George E, et al. Can we measure beauty? Computational evaluation of coral reef aesthetics. PeerJ. 2015; 3: e1390.
Carter et al. 2015	2015	PLOS One	N. America	USA	Internet search frequency (Google Trends)	Fisheries management	Seasonal trends in red snapper (Lutjanus campechanus) recreational fishery in the Gulf of Mexico	Carter DW, Crosson S, Liese C. Nowcasting intraseasonal recreational fishing harvest with internet search volume. PLoS One. 2015; 10: e0137752.
Francis et al. 2019	2019	PeerJ	Global	Global	News articles	Fisheries management	Inferring overfishing and declining abundance and body size of marine fish over time, based on maximum fish sizes reported in news media	Francis FT, Howard BR, Berchtold AE, Branch TA, Chaves LCT, Dunic JC, et al. Shifting headlines? Size trends of newsworthy fishes. PeerJ. 2019; 7: e6395.
Giovos et al. 2018	2018	Fish Manag Ecol	Europe	Croatia, Cyprus, France, Greece, Italy, Malta, Slovenia and Spain	YouTube	Fisheries management	Profiling recreational fishery in the Mediterranean, including species composition and fishing gears	Giovos I, Keramidas I, Antoniou C, Deidun A, Font T, Kleitou P, et al. Identifying recreational fisheries in the Mediterranean Sea through social media. Fish Manag Ecol. 2018; 25: 287-295.
Giovos et al. 2019	2019	Mar Policy	Europe	Greece	Facebook, Instagram, YouTube	Fisheries management	Detection of illegal elasmobranch fishery in Greece based on online media	Giovos I, Arculeo M, Doumpas N, Katsada D, Maximiadi M, Mitsou Ε, et al. Assessing multiple sources of data to detect illegal fishing, trade and mislabelling of elasmobranchs in Greek markets. Mar Policy. 2019; 103730. doi:10.1016/j.marpol.2019.103730 (in press)
Jimenez‐Alvarado et al. 2019	2019	J Fish Biol	Europe	Spain	Images	Fisheries management	Overfishing, decline in body size of dusky groupers (Epinephelus marginatus) and changes in species composition, assessed based on historic photographs of recreational fishery captures from Gran Canaria	Jiménez‐Alvarado D, Sarmiento‐Lezcano A, Guerra‐Marrero A, Tuya F, Santana Del Pino Á, Sealey MJ, et al. Historical photographs of captures of recreational fishers indicate overexploitation of nearshore resources at an oceanic island. J Fish Biol. 2019; 94: 857-864.
McClenachan 2009	2009	Conserv Biol	N. America	USA	Images	Fisheries management	Inferring overfishing and declining abundance and body size of trophy fish in Florida Keys	McClenachan L. Documenting loss of large trophy fish from the Florida Keys with historical photographs. Conserv Biol. 2009; 23: 636-643.
Mittermeier et al. 2019	2019	PLOS Biol	Europe, N. America, Asia	Multiple countries	Wikipedia pageviews	Fisheries management	Sockeye salmon (Oncorhynchus nerka) and Atlantic salmon (Salmo salar) popularity based on Wikipedia pageviews reflects their seasonal migration patterns	Mittermeier JC, Roll U, Matthews TJ, Grenyer RA. season for all things: Phenological imprints in Wikipedia usage and their relevance to conservation. PLoS Biol. 2019; 17: e3000146.
Monkman et al. 2018	2018	Biol Conserv	Europe	UK	Forums	Fisheries management	Spatio-temporal distribution and intensity of the shore-based recreational European seabass (Dicentrarchus labrax) fishery in Wales	Monkman GG, Kaiser MJ, Hyder K. Text and data mining of social media to map wildlife recreation activity. Biol Conserv. 2018; 228: 89-99.
Sbragaglia et al. 2019	2019	ICES J Mar Sci	Europe	Italy	YouTube	Fisheries management	Harvesting patterns of marine recreational anglers and spearfishers in Italy	Sbragaglia V, Correia RA, Coco S, Arlinghaus R. Data mining on YouTube reveals fisher group-specific harvesting patterns and social engagement in recreational anglers and spearfishers. ICES J Mar Sci. 2019; fsz100. doi:10.1093/icesjms/fsz100 (in press)
Wilde & Pope 2013	2013	Fish Manag Ecol	Global	Global	Internet search frequency (Google Trends)	Fisheries management	Worldwide trends in fishing interest and seasonality	Wilde GR, Pope KL. Worldwide trends in fishing interest indicated by internet search volume. Fish Manag Ecol. 2013; 20: 211-222.
Albert et al. 2018	2018	PLOS One	Global	Global	Images, surveys	Flagship species	Identification of most charismatic species (both aquatic and terrestrial)	Albert C, Luque GM, Courchamp F. The twenty most charismatic species. PLoS One. 2018; 13: e0199149.
Davies et al. 2018	2018	PLOS One	Global	Global	Internet search frequency (Google Trends)	Flagship species	Identification of the most popular veretebrates on Internet (both aquatic and terrestrial)	Davies T, Cowley A, Bennie J, Leyshon C, Inger R, Carter H, et al. Popular interest in vertebrates does not reflect extinction risk and is associated with bias in conservation investment. PLOS One. 2018; 13: e0203694.
McClain 2019	2019	PeerJ	Global	Global	Facebook	Flagship species	Interest in marine organism imagery	McClain CR. Likes, comments, and shares of marine organism imagery on Facebook. PeerJ. 2019; 7: e6795.
Roll et al. 2016	2016	Biol Conserv	Global	Global	Wikipedia pageviews	Flagship species	Identification of cultural interest in reptiles (both aquatic and terrestrial)	Roll U, Mittermeier JC, Diaz GI, Novosolov M, Feldman A, Itescu Y, et al. Using Wikipedia page views to explore the cultural importance of global reptiles. Biol Conserv. 2016; 204: 42-50.
Becken et al. 2017	2017	J Environ Manage	Oceania	Australia	Twitter	Management of protected areas and aquatic landscapes	Attitude of visitors in the Great Barrier Reef, assessed through the sentiment analysis	Becken S, Stantic B, Chen J, Alaei AR, Connolly RM. Monitoring the environment and human sentiment on the Great Barrier Reef: assessing the potential of collective sensing. J Environ Manage. 2017; 203: 87-97.
Becken et al. 2019	2019	Ecol Inform	Oceania	Australia	Twitter	Management of protected areas and aquatic landscapes	Attitude of visitors in the Great Barrier Reef, assessed through the sentiment analysis	Becken S, Connolly RM, Chen J, Stantic B. A hybrid is born: Integrating collective sensing, citizen science and professional monitoring of the environment. Ecol Inform. 2019; 52: 35-45.
Chen et al. 2020	2020	Ocean Coast Manage	N. America	Canada	Instagram	Management of protected areas and aquatic landscapes	Cultural ecosystem service of dykelands and marshes of the Cornwallis (Jijuktu’kwejk) River, Nova Scotia, Canada	Chen Y, Caesemaecker C, Rahman HT, Sherren K. Comparing cultural ecosystem service delivery in dykelands and marshes using Instagram: A case of the Cornwallis (Jijuktu'kwejk) River, Nova Scotia, Canada. Ocean Coast Manage. 2020; 193: 105254.
Do 2019	2019	Ecosyst Serv	Asia	S. Korea	Instagram	Management of protected areas and aquatic landscapes	Aesthetic judgement and cultural ecosystem services of Ramsar wetlands in South Korea, Suncheon Bay and Upo Wetlands, analyzed based on sentiment analysis and facial expression analysis in photographs	Do Y. Valuating aesthetic benefits of cultural ecosystem services using conservation culturomics. Ecosyst Serv. 2019; 36: 100894.
Do et al. 2015	2015	Conserv Biol	Asia	S. Korea	Internet search volumes (Naver search engine)	Management of protected areas and aquatic landscapes	Public awareness and interest in protected wetlands in South Korea	Do Y, Kim JY, Lineman M, Kim DK, Joo GJ. Using internet search behavior to assess public awareness of protected wetlands. Conserv Biol. 2015; 29: 271-279.
Ghermandi 2016	2016	Water Res	Global	Global	Flickr	Management of protected areas and aquatic landscapes	Public preferences for natural water and wastewater treatment systems	Ghermandi A. Analysis of intensity and spatial patterns of public use in natural treatment systems using geotagged photos from social media. Water Res. 2016; 105: 297-304.
Ghermandi 2018	2018	Ecosyst Serv	Global	Global	Flickr	Management of protected areas and aquatic landscapes	Societal preferences for recreational services of ecologically engineered wetlands	Ghermandi A. Integrating social media analysis and revealed preference methods to value the recreation services of ecologically engineered wetlands. Ecosyst Serv. 2018; 31: 351-357.
Ghermandi et al. 2020	2020	Tour Manag	N. America	Mexico	Flickr	Management of protected areas and aquatic landscapes	Cultural ecosystem services and tourism in the Usumacinta floodplain	Ghermandi A, Camacho-Valdez V, Trejo-Espinosa H. Social media-based analysis of cultural ecosystem services and heritage tourism in a coastal region of Mexico. Tour Manag. 2020; 77: 104002.
Hale et al. 2019	2019	Ecol Indic	N. America	USA	Flickr	Management of protected areas and aquatic landscapes	Cultural ecosystem services of rivers in Idaho	Hale RL, Cook EM, Beltrán BJ. Cultural ecosystem services provided by rivers across diverse social-ecological landscapes: A social media analysis. Ecol Indic. 2019; 107: 105580.
Kim et al. 2019	2019	Tour Manag	Asia	Thailand	Flickr	Management of protected areas and aquatic landscapes	Nature-based tourism intensity in protected areas (both aquatic such as mangroves and coral reefs, and terrestrial) in Southeast Asia	Kim Y, Kim CK, Lee DK, Lee HW, Andrada RIT. Quantifying nature-based tourism in protected areas in developing countries by using social big data. Tour Manag. 2019; 72: 249-256.
Retka et al. 2019	2019	Ocean Coast Manage	S. America	Brazil	Flickr	Management of protected areas and aquatic landscapes	Cutural ecosystem services of a marine protected area (Área de Proteção Ambiental Costa dos Corais) in Brazil	Retka J, Jepson P, Ladle RJ, Malhado ACM, Vieira FAS, Normande IC, et al. Assessing cultural ecosystem services of a large marine protected area through social media photographs. Ocean Coast Manage. 2019; 176: 40-48.
Richard & Friess 2015	2015	Ecol Indic	Asia	Singapore	Flickr	Management of protected areas and aquatic landscapes	Cultural ecosystem services of mangrove nature reserves in Singapore	Richards DR, Friess DA. A rapid indicator of cultural ecosystem service usage at a fine spatial scale: content analysis of social media photographs. Ecol Indic. 2015; 53: 187-195.
Sinclair et al. 2018	2018	Sci Tot Environ	Asia	India	Flickr	Management of protected areas and aquatic landscapes	Recreational ecosystem service values and tourism intensity in Ramsar wetlands in Kerala state, India	Sinclair M, Ghermandi A, Sheela AM. A crowdsourced valuation of recreational ecosystem services using social media data: An application to a tropical wetland in India. Sci Tot Environ. 2018; 642: 356-365.
Sinclair et al. 2019	2019	Tour Manag	Asia	India	Flickr	Management of protected areas and aquatic landscapes	Recreational ecosystem service values and tourism intensity in Ramsar wetlands in Kerala state, India	Sinclair M, Ghermandi A, Moses SA, Joseph S. Recreation and environmental quality of tropical wetlands: A social media based spatial analysis. Tour Manag. 2019; 71: 179-186.
Spalding & Parrett 2019	2019	Mar Policy	Global	Global	TripAdvisor	Management of protected areas and aquatic landscapes	Profiling and mapping tourism and recreational use patterns of mangroves worldwide	Spalding M, Parrett CL. Global patterns in mangrove recreation and tourism. Mar Policy. 2019; 110: 103540.
Chen et al. 2018	2018	Landscape Urban Plan	N. America	Canada	Instagram	Social impact assessment	Social impact assessment of the area of a planned hydroelectric dam construction on the Peace River in British Columbia, and of a degrading Mactaquac Dam on St. John River in New Brunswick, Canada	Chen Y, Parkins JR, Sherren K. Using geo-tagged Instagram posts to reveal landscape values around current and proposed hydroelectric dams and their reservoirs. Landscape Urban Plan. 2018; 170: 283-292.
Chen et al. 2019	2019	Soc Nat Res	N. America	Canada	Instagram	Social impact assessment	Social impact assessment of the area of a planned hydroelectric dam construction on the Peace River in British Columbia, and of a degrading Mactaquac Dam on St. John River in New Brunswick, Canada	Chen Y, Parkins JR, Sherren K. Leveraging social media to understand younger people’s perceptions and use of hydroelectric energy landscapes. Soc Nat Res. 2019; 32: 1114-1122.
Jiang et al. 2016	2016	J Constr Eng Manag	Asia	China	News articles, forums, microblogs	Social impact assessment	Sentiment analysis of public opinion regarding large hydro projeects	Jiang H, Lin P, Qiang M. Public-opinion sentiment analysis for large hydro projects. J Constr Eng Manag. 2016; 142: 05015013.
Sherren et al. 2017	2017	Environ Impact Assess Rev	N. America	Canada	Instagram	Social impact assessment	Social impact assessment of the area of a planned hydroelectric dam construction on the Peace River in British Columbia, and of a degrading Mactaquac Dam on St. John River in New Brunswick, Canada	Sherren K, Parkins JR, Smit M, Holmlund M, Chen Y. Digital archives, big data and image-based culturomics for social impact assessment: opportunities and challenges. Environ Impact Assess Rev. 2017; 67: 23-30.
Atsumi & Koizumi 2017	2017	Ecol Res	Asia	Japan	Google Images, Twitter	Other	Geographic variations in breeding season and nuptial coloration in Japanese dace in Japan	Atsumi K, Koizumi I. Web image search revealed large-scale variations in breeding season and nuptial coloration in a mutually ornamented fish, Tribolodon hakonensis. Ecological Research. 2017; 32(4): 567-578.
Hentati-Sundberg & Olsson 2016	2016	Curr Biol	Europe	Sweden	Images	Other	Population trends and breeding monitoring of a seabird, common guillemot (Uria aalge)	Hentati-Sundberg J, Olsson O. Amateur photographs reveal population history of a colonial seabird. Curr Biol. 2016; 26: R226-R228.
Mikula et al. 2018	2018	PeerJ	Africa	Multiple countries	Google Images	Other	Interspecific interactions (commensalistic-mutualitic) among both freshwater and terrestrial mammals and birds in Africa	Mikula P, Hadrava J, Albrecht T, Tryjanowski P. Large-scale assessment of commensalistic–mutualistic associations between African birds and herbivorous mammals using internet photos. PeerJ. 2018; 6: e4520.
